# Supplementary material for: An inner activation gate controls TMEM16F phospholipid scrambling
Source: PubMed Central journal article supplement (PMC6478717; doi:10.1038/s41467-019-09778-7), 2019-04-23
Supplement: 41467_2019_9778_MOESM1_ESM.pdf [file 41467_2019_9778_MOESM1_ESM.pdf]

## **Supplementary Information for**

### **An inner activation gate controls TMEM16F phospholipid scrambling**

Trieu Le, Zhiguang Jia, Son C. Le, Yang Zhang, Jianhan Chen, Huanghe Yang\*

**This PDF file includes:**

Supplementary Figs. 1-7  
Supplementary Tables 1-2

**Other Supplementary Materials for this manuscript includes the following:**

Supplementary Movies 1-2  
Source Data file

**a**

Trans-membrane domain Gate

```

mTMEM16A 1 MRVPEKYSTLPAAE-----DRSVHIVNICAIEDLGLPSEGTLNLSV-DPDAECKYG---LYFRDGKRKVDYILIV 68
mTMEM16F 1 MQMMTRKVLNMELEDDDDGDVLENF---DQTIVCPTFGSLENQDFRTPFEFEFNKPDLSLFFTDGQRIDFILIV 77
nhTMEM16 1 -----
-----
-----

mTMEM16A 69 HHKRASGSRTLARRGLQNDMVLGTRSVRQDQPLPGKGSFVDAGSPEVPMYHEDDKRFRREEYEGN-----LLEAGLE 141
mTMEM16F 78 EDESKKENNK-----KGT-----NEKQKR-KRQAYESN-----LIICHGLQ 111
nhTMEM16 1 -----MSNLKDFSQPGSGQESNFG---VDVFHYHKVPAARDEAEAGFVQLIRALITVGLA 53
-----

mTMEM16A 142 LENEDETKIHGVGFVKIHAPWHVLCREAEFLKLMPTKVVHISETR---GLLKTINSVLQKITDPIQPKVAEHRPQTK 218
mTMEM16F 112 LEATRVSDDKLVFVKVHAPWEVLCTYAEIMHIKLPKP--NDLKTRSPFGNINWFTKVLRVNESVVKPE-----QE 181
nhTMEM16 54 TEVRHGENESLLVFKVASP-----DLFAKQV---YRARLGDWLHGVRVSAPHNDIAQAL----- 105
-----

mTMEM16A 219 RLSYFVSREKQHLFDLTDSDFFSKTRSTIVVEILKRTTCTKAKYSM-----GITSLLANGVY-SAAYP LHDG--DY 288
mTMEM16F 182 FFTAPFEKSRMNDFYLLDRDSFFNATRSTRIVYFLSRV----KYQVMNVNKGKINRIVSSGIY-KAAPFLHDCRFNY 255
nhTMEM16 106 -----QDEPVVEAERLRLIYLMITKP-----HNEGAGVTPNAKWKHVESIFPLHSHSFNK 157
-----

mTMEM16A 289 EGDNVEF-NDRKLLYEAWASYGVFYKQPIDLVKRYFGEKVGLYFAWLGAANTQMLIPASIVGVIVELYGCATVDENIPSM 367
mTMEM16F 256 ESEDISCPSERYLLYREWAHRSIYKKQPLDLIRKYGEKIGIYFAWLGYTQMLLLAAVGVACFLYGLYLDQDNCTWSK 335
nhTMEM16 158 E-----WIKKWSKYTL-EQTIDINIRDFEGSVAFYFAFLRSYFRFLVIPSFAFGGAWLL----- 212
-----

mTMEM16A 368 EMCQQRYN--ITMCPCLDKCTSYWKMSACATARASHLEDNPAIVFVSFVMAWAATFMEHWKQRQMLNRYWDLTGFEF 445
mTMEM16F 336 EVCDDPIGGQILMPCQCDRLCPFWRLNITCESSKLCIFDSFGTLIFAVFMGVVWTLFLEFWKRRQAELEYEDWTVLQ 415
nhTMEM16 213 -----LG-----QFSYLYALLCGLWSVVFETWKKQEVDLAVQWGVGVSS 253
-----

mTMEM16A 446 EEEAVDHPRAEYEARVLEKSLRKRERKNETDKVKLWDRDFPAYFTNLVSIIFMIAVTFAIVLGVLIYRISTAAALAM- 524
mTMEM16F 416 EEQA-----RPEYEAQCNHVINEITQEEE--RIPFTTGGKIRVTLCASAVFWFLLIIASVIGIIVYRLSVFVFTST 488
nhTMEM16 254 IQQS-----RPEFEW-----EHEAEDPTTGEVVKVYPMKRVKTLQLLQIPFALACVVA--LGALIVTCNSLEVF 318
-----

mTMEM16A 525 -----NSSPSVRSNI--RVTVTATAVINVVIILLDEVGCIARWLRIEVPKTEKSFERLTFKAPLLKPVNMYTPIE 597
mTMEM16F 489 LPKNPNGTDPIDQKYLTPQMATSI TASIISIIIMILNTIYEKVAIMITNFELPRTPQDYENSLTMGMFLQFVNIYSSCF 568
nhTMEM16 319 VY-----SGPGKQYL-----GFLPTIFLIGTPTTISGVLMAAEKLNAMENYATVDAHDAALIQKQFVLFNMTS 387
-----

mTMEM16A 598 YVAFFKGRFVGRPGDYVYIFRSF-----RMEECAPGGCLMELCIQLSITMLGKOLIQNNLEIFGIPKM 660
mTMEM16F 569 YIAFFKGFVGVPGDPVYLLGKY-----RSEECDPGGCLLELTQLTITMGGKAIW-NNIQEVLEPW 630
nhTMEM16 388 FTAFVYIIF-----GHLLHPLFNWRATAQTLTFSEKELPTREFQINPA---RISNQMFYITVTAQIV-NFATEVVVY 458
-----

mTMEM16A 661 KKFIRYLYLRRQSPSDREEYVQRKQRYEVDFNLE-P--FAGLTPEYMEMI IQPGFVILFVASFPLAPLALLANNIIEIRL 737
mTMEM16F 631 MNLIGRYKRVSGS-----EKITPRWEQDYHLQ-PMGKLGFLFEYLEMI IQPGFVILFVASFPLAPLALLANNIIEIRV 702
nhTMEM16 459 KQAFQKAKQLKSGSKVQEDHEEAEFLQRVRECTL EEDYDVS GDYREVMVQFVYMFVSAWPLAACCFVNNVVELRS 538
-----

mTMEM16A 738 DAKKVFTELRFPVAIRAKDIGIWIYNIIRGVGKLAVINAFVISFTSDFIPRLVLYMYS-----QNGTMHG FVNHTLS 810
mTMEM16F 703 DAWKLTQTQRRMVPEKAQDIGAWQPIMQGIALLAVTNAMIATSDMIPLRVYYWSFSPYPYGDHTYTYMDGYINNTLS 782
nhTMEM16 539 DALKIALSSRRPIPWRTDSIGPWL TALSFLSWLGSITSSAIVLCSNS----- 586
-----

mTMEM16A 811 SFNVSDFQNGTAPNDPLDLYEVQICRYKYDREPPWSEHKYDISKDFWAVLAARLAFIVFQNLVFMFMSDFVDWVLPDIP 890
mTMEM16F 783 VENITDFKNTDKENPYIGLG-NYTLCRYDFRNPPGHPQEKHNIYWHVIAAKLAFIVMEHIYSVKFFISYALPDVS 861
nhTMEM16 587 -----KNGTQGEASPLKA-----WGL---LLSILFAEHFYLVVQLAVRVLKSLD 628
-----

mTMEM16A 891 KDISQIHKKEKLVMLVEFMREEQKQQLDITWMEKEKPRDVPNNHSPHTPEAGDGSVPVSEYHGDAL----- 960
mTMEM16F 862 KITKSKIKREKYLTKL-LHESHLKDLTKNMGIIAERIGGTVDNSVRPKLE----- 911
nhTMEM16 629 SPGLQKERKERFQTKRRLQE-----NLGQDAEEAAAPGIEHSEKITREALE-EEARQASIRGHGTPEEMFWQRQR 699
-----

mTMEM16A -----
mTMEM16F -----
nhTMEM16 700 GMQETIEIGRRMIEQQLAAGKNGKKSAPAVPSEKAS 735

```

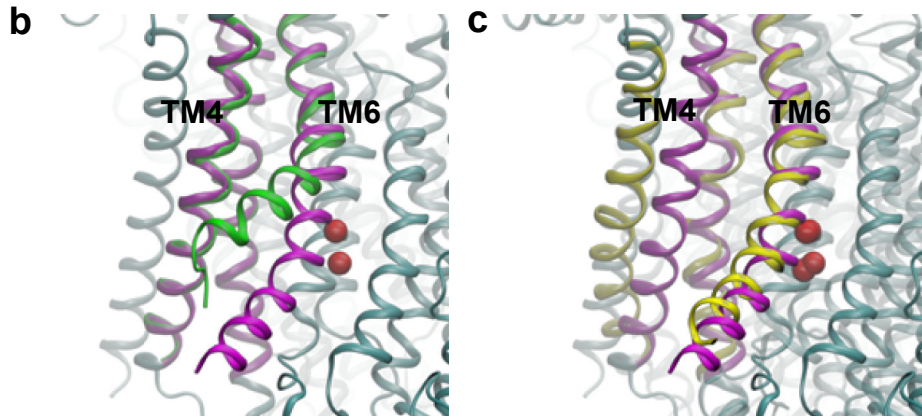

50YB (Magenta) and 50YG (Green) 50YB (Magenta) and 4WIS (Yellow)

**d**

| Transmembrane domain | Putative inner gate residues |         |         |
|----------------------|------------------------------|---------|---------|
|                      | nhTMEM16                     | TMEM16A | TMEM16F |
| TM4                  | V337                         | L543    | F518    |
| TM5                  | S382                         | S588    | Y563    |
| TM6                  | F440                         | I637    | I612    |

**Supplementary Figure 1. Comparison between the sequences and structures of TMEM16A, TMEM16F and nhTMEM16.** **a** Sequence alignment of mTMEM16A, mTMEM16F and nhTMEM16. Transmembrane (TM) domains and the inner gate residues are highlighted in cyan and red respectively. **b** Superposition of Ca<sup>2+</sup>-free (PDB: 5OYG; green) and Ca<sup>2+</sup>-bound (PDB: 5OYB; magenta) mTMEM16A structures, showing the movement of TM 6 around the glycine hinge. **c** Superposition of Ca<sup>2+</sup>-bound nhTMEM16 (PDB: 4WIS; yellow) and Ca<sup>2+</sup>-bound mTMEM16A structures (PDB: 5OYB; magenta). TMs 4-6 are highlighted in color. **d** Summary of nhTMEM16 and TMEM16A residues that are equivalent to TMEM16F's inner gate residues.

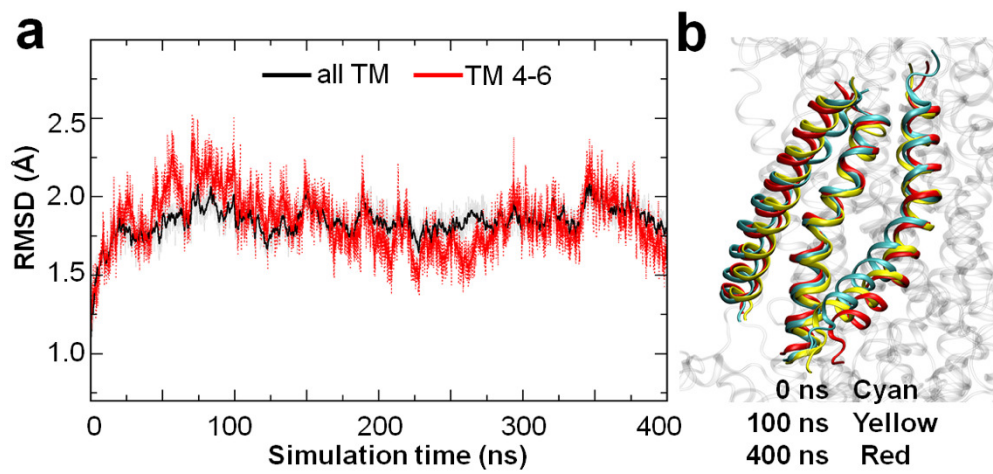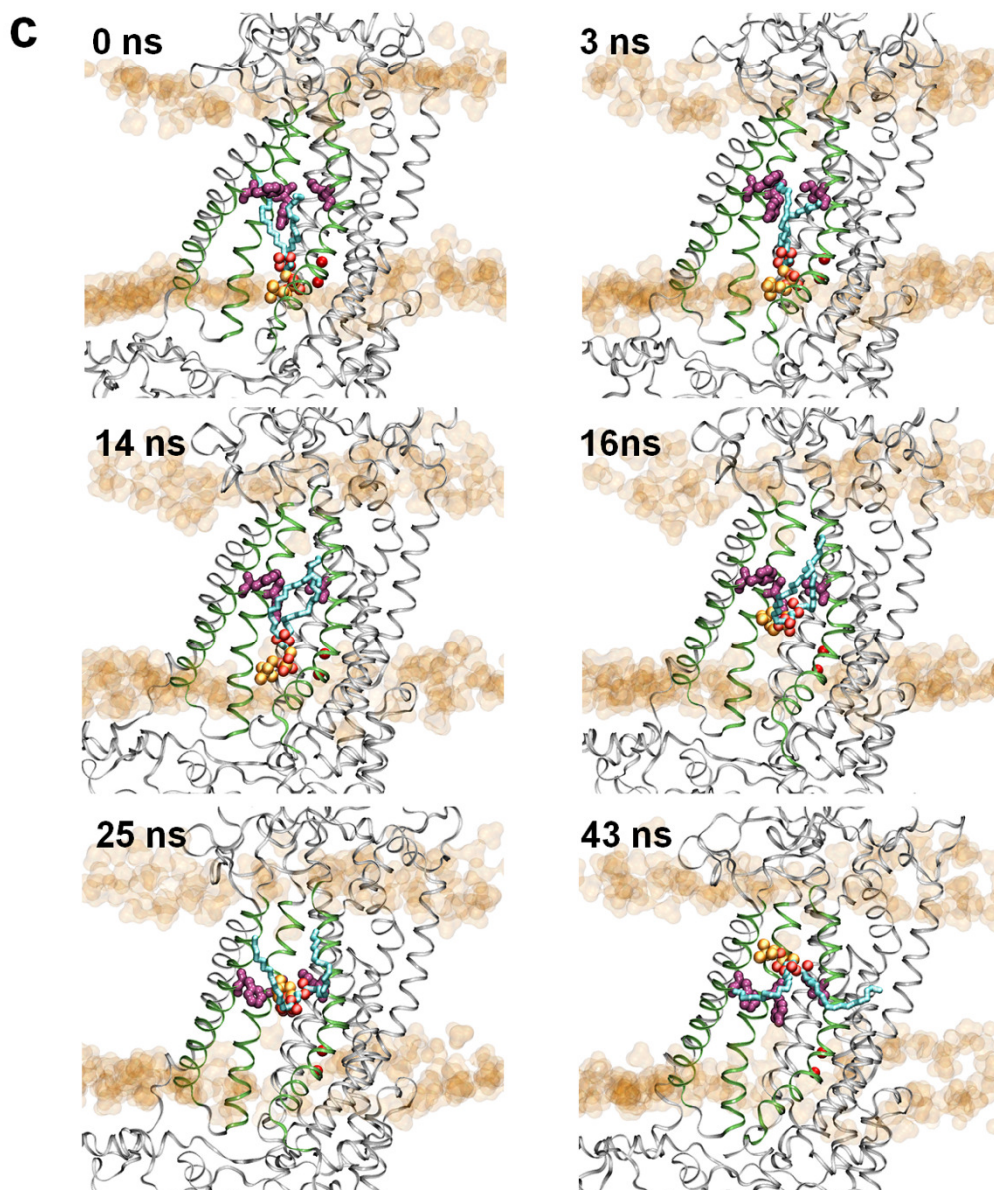



**Supplementary Figure 2. Molecular dynamic simulation of an open state TMEM16F-CaPLSase homology model.** **a** Atomistic simulations showing the stability of the open state model of TMEM16F. Backbone RMSD values of the entire TM domain (black trace) and TMs 4-6 (red trace) in one of the TMEM16F monomers in a 400-ns simulation with respect to the initial structure. **b** Superposition of the 0 ns (cyan), 100 ns (yellow) and 400 ns (red) structures from the same simulation in a. **c** Atomistic simulation of a POPC phospholipid permeating through the putative inner gate (purple spheres) of TMEM16F. The head group of the POPC molecule (orange spheres with long cyan tails) initially resided in the inner leaflet (0-14 ns), then spontaneously crossed the inner gate region (15-25ns), and eventually reached the outer leaflet of the membrane (43 ns and onward). TMs 4-6 are represented in green cartoon. The phosphate groups of POPC within 15 Å of protein are represented using orange transparent Van der Waals surfaces.

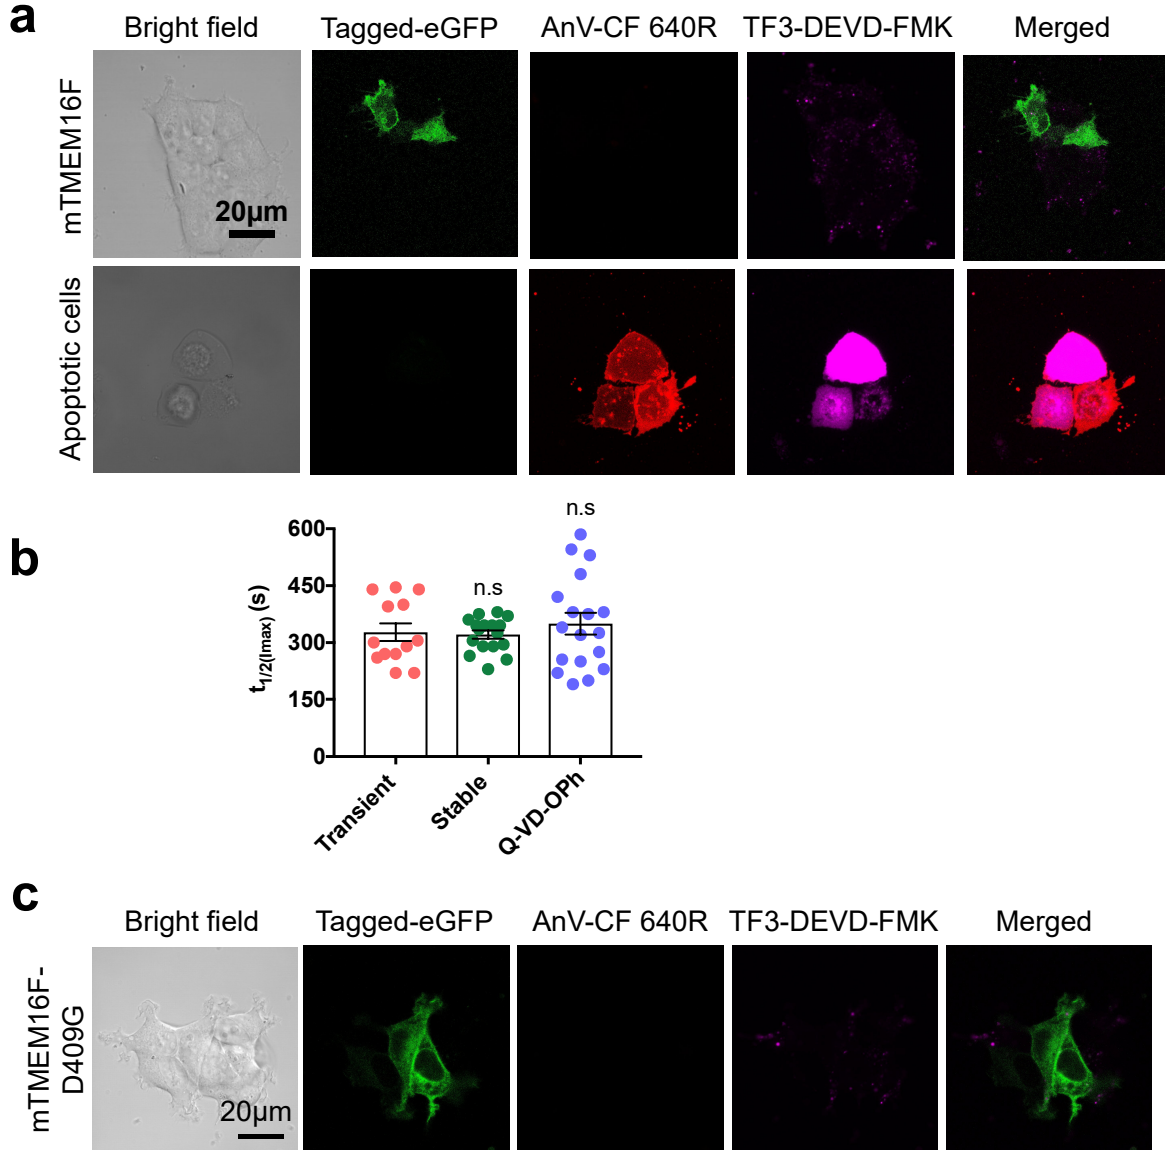

**Supplementary Figure 3. Heterologous expression of TMEM16F does not induce spontaneous PS surface exposure and cell apoptosis.** **a** Representative images of TMEM16F-KO HEK293T cells transiently transfected with wildtype mTMEM16F compared with apoptotic cells. mTMEM16F is tagged with eGFP at its C-terminus. PS exposure of apoptotic cells is labeled with AnV-CF 640R (red). Apoptotic cells also show strong cleaved caspases 3/7 activities as labeled with TF3-DEVD-FMK (purple). **b** No difference in scrambling activity for HEK293T cells stably or transiently expressed TMEM16F with and without Q-VD-Oph, a pan-caspase inhibitor. Statistical analysis was performed using One-way ANOVA with Turkey's multiple comparisons test. p-values are 0.98 for Transient vs. Stable and 0.7735 for Transient vs. Q-VD-Oph. n.s denotes not significant. Error bars indicate SEM. Source data are provided as a Source Data file. **c** Representative images of the D409G-expressing cells (green) stained with AnV-CF 640R (red) and TF3-DEVD-FMK (purple). Scale bars, 20  $\mu$ m.

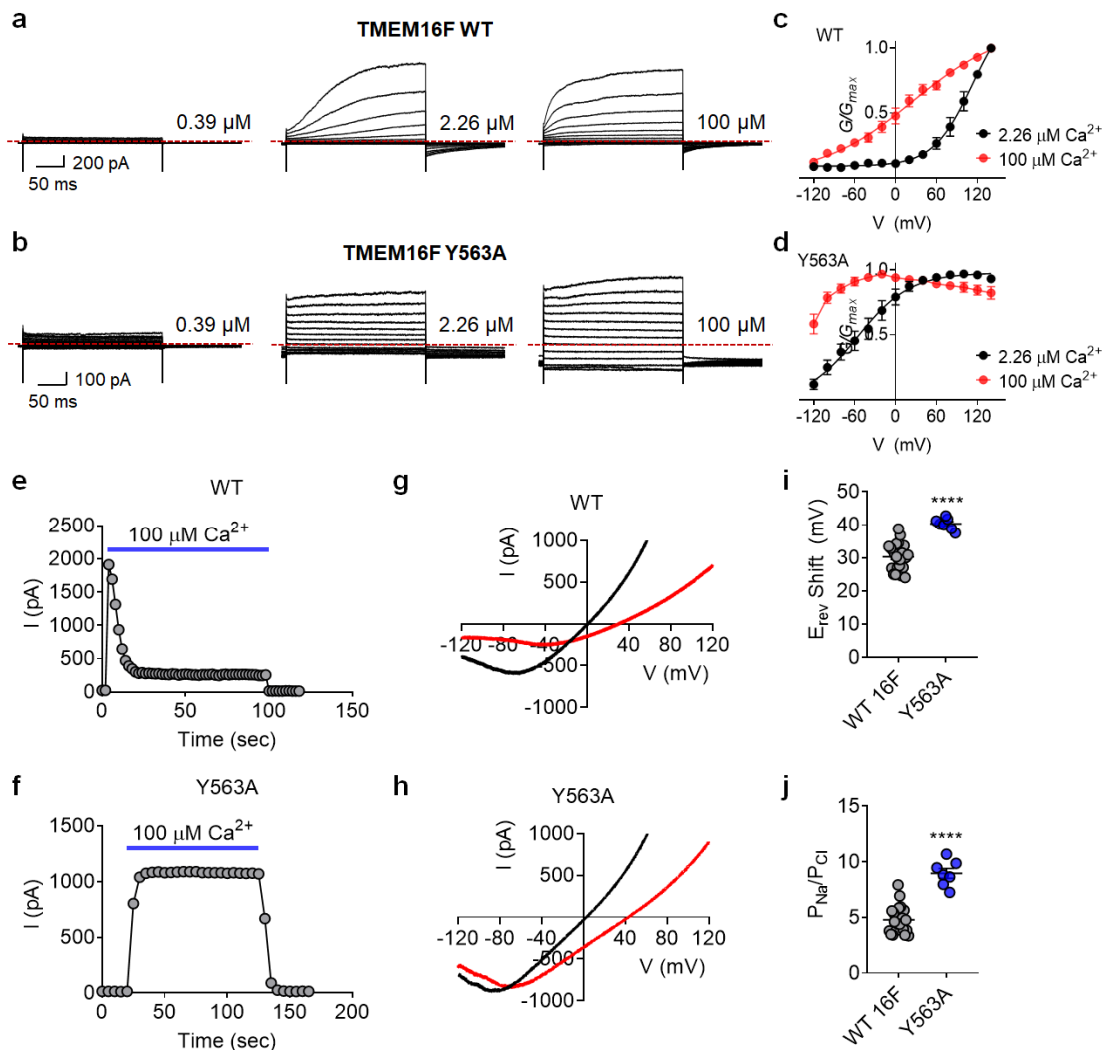

**Supplementary Figure 4. Functional characterization of TMEM16F.** **a, b** Representative current traces from inside-out patches excised from HEK293T cells expressing wildtype TMEM16F (WT, **a**) and Y563A-TMEM16F (**b**) when exposed to 0.39, 2.26 and 100  $\mu\text{M}$   $\text{Ca}^{2+}$ . Testing potentials were from -120 mV to +140 mV at a 20 mV increment. Both holding and repolarizing potentials were -60 mV. The red dotted lines mark zero current. **c, d**  $G$ - $V$  relations of WT-TMEM16F (**c**) and Y563A-TMEM16F (**d**) channels under 2.26  $\mu\text{M}$  and 100  $\mu\text{M}$   $\text{Ca}^{2+}$ . Relative conductance was determined by measuring the amplitudes of tail currents measured at the -60 mV repolarization following each test voltage step. Error bars represent SEM. **e, f** Whereas TMEM16F WT exhibited pronounced rundown under 100  $\mu\text{M}$  intracellular  $\text{Ca}^{2+}$  (**e**), Y563A abolished channel rundown (**f**). **g, h** Measurements of the reversal potentials ( $E_{\text{rev}}$ ) for TMEM16F WT (**g**) and Y563A (**h**). Black traces denote currents at symmetric 140 mM NaCl; red traces denote currents upon switching to an intracellular solution with low 14 mM NaCl. An inverted V-shaped voltage ramp ranging from -120 mV to +120 mV was used to elicit channel activation and followed by a reserved +120 mV to -120 mV ramp, which was used to measure reversal potentials. Currents were recorded under 100  $\mu\text{M}$  intracellular  $\text{Ca}^{2+}$ . **i, j** Changes in the reversal potential ( $E_{\text{rev}}$ ) of TMEM16F WT and Y563A (**i**) and their permeability ratio  $P_{\text{Na}}/P_{\text{Cl}}$  (**j**). Two-tailed un-paired

Student's t-tests: p-values are both  $<0.0001$  in **i** and **j**. Source data are provided as a Source Data file.

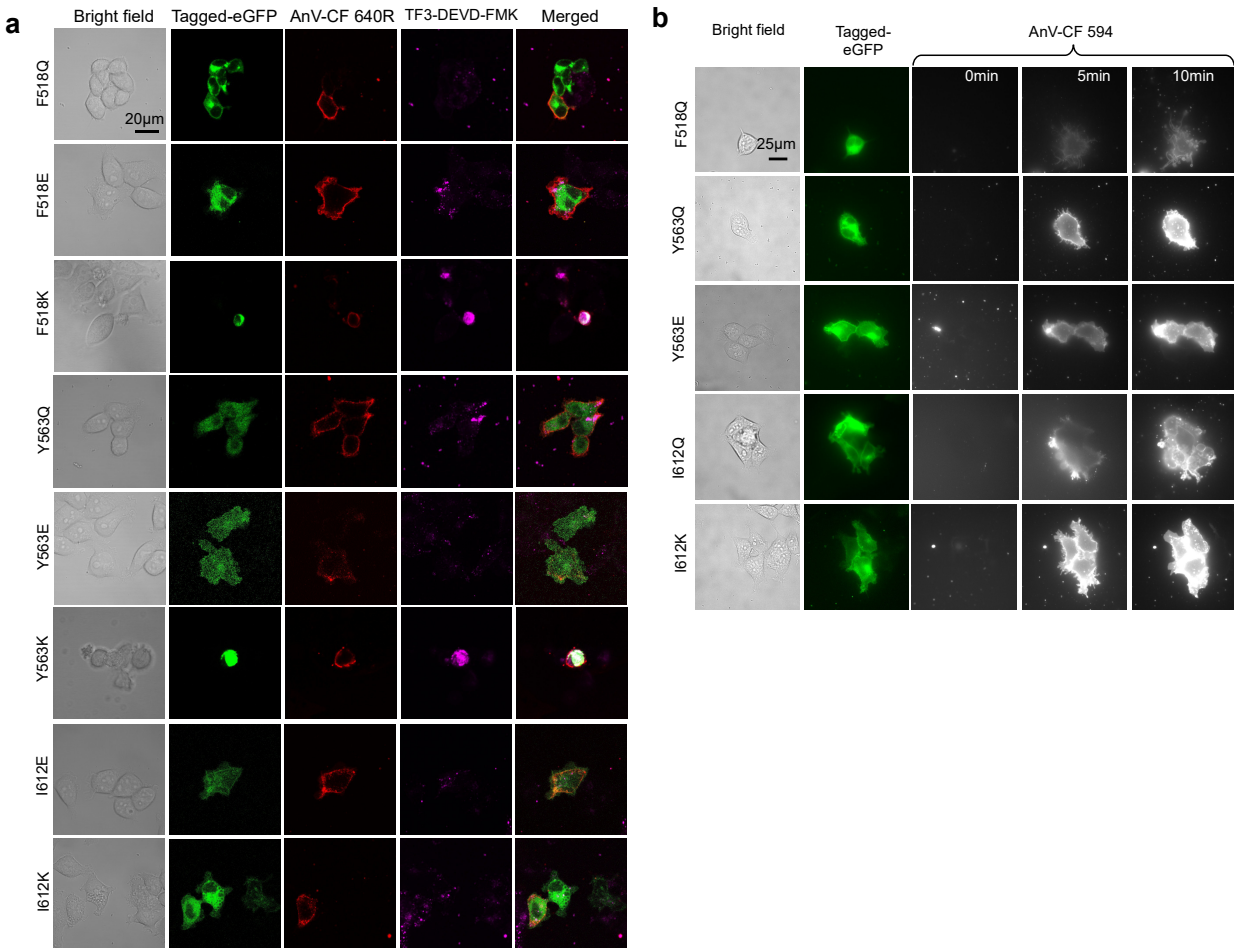

**Supplementary Figure 5. Representative images of the TMEM16F inner gate mutations with charged or polar sidechains.** **a** TMEM16F inner gate mutations with charged or polar sidechains are constitutively activated under basal  $\text{Ca}^{2+}$  level. Images were taken in the absence of ionomycin stimulation. Protein expression of TMEM16F mutants is visualized by their C-terminally tagged eGFP in TMEM16F-KO HEK293T cells. AnV-CF 640R staining labels spontaneously exposed PS on cell surface. Strong and punctuated TF3-DEVD-FMK staining of cleaved caspases 3/7 indicates apoptotic cells. **b** Representative images of ionomycin-induced scrambling activity of TMEM16F-KO HEK293T cells expressing eGFP-tagged TMEM16F- F518Q, Y563Q, Y563E, I612Q and I612K. CF 594-tagged-AnV signal representing phospholipid scrambling was recorded by time-lapsed imaging for 10-minute following application of 5  $\mu\text{M}$  ionomycin (0 min) at a 5-second acquisition interval. All of the experiments based on AnV labeling were done in  $\text{Ca}^{2+}$ -containing buffer. Scale bars, 20  $\mu\text{m}$  in **(a)** and 25  $\mu\text{m}$  in **(b)**.



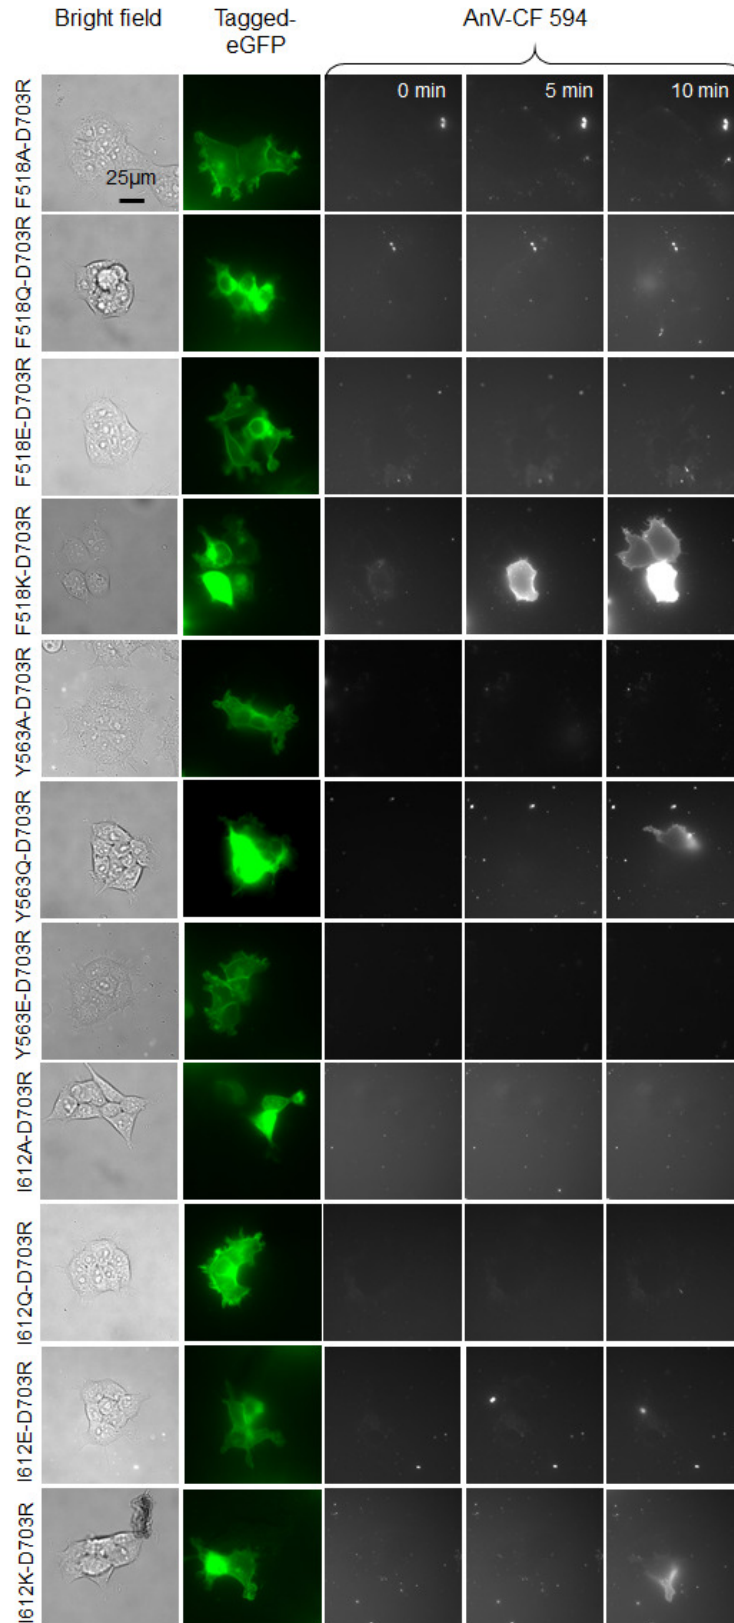

**Supplementary Figure 6. Measurement of ionomycin-induced CaPLSase activity of the gain-of-function TMEM16F inner gate mutations coupled with D703R. Representative images of**

ionomycin-induced scrambling activity of TMEM16F-KO HEK293T cells expressing eGFP-tagged TMEM16F gain-of-function mutants that are coupled with D703R. CF 594-tagged-AnV signal representing phospholipid scrambling was recorded by time-lapsed imaging for 10-minute following application of 5  $\mu$ M ionomycin (0 min) at a 5-second acquisition interval. All of the experiments based on AnV labeling were done in  $\text{Ca}^{2+}$ -containing buffer. Scale bars, 25  $\mu$ m.

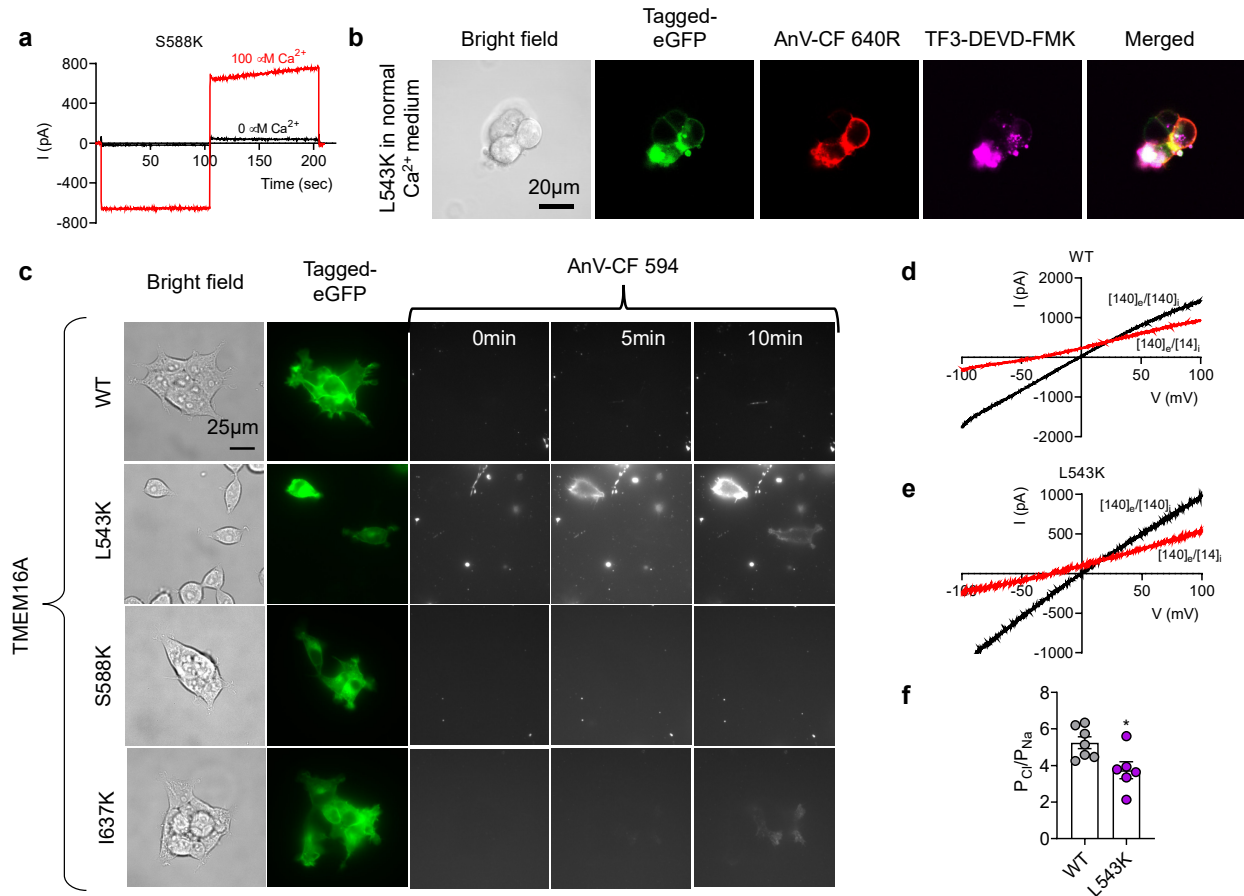

**Supplementary Figure 7. Measurement of ionomycin-induced CaPLSase activity of the TMEM16A inner gate mutations.** **a** Representative recording showing activation of S588K when  $0 \mu\text{M Ca}^{2+}$  (black trace) or  $100 \mu\text{M Ca}^{2+}$  (red trace) was applied to the cytosolic side of an inside-out patch excised from HEK293T cells expressing TMEM16A S588K. **b** Representative images of TMEM16A L543K-expressing TMEM16F-KO HEK293T cells (green) in normal medium without ionomycin stimulation. AnV-CF 640R (red) labels PS positive cells. TF3-DEVD-FMK staining indicates cleaved caspases 3/7 (purple). **c** Representative images of ionomycin-induced scrambling activity of TMEM16F-KO HEK293T cells expressing eGFP-tagged TMEM16A-WT, -L543K, -S588K and -I637K. CF 594-tagged-AnV signal representing phospholipid scrambling was recorded by time-lapsed imaging for 10-minute post  $2.5 \mu\text{M}$  ionomycin application (0 min) at a 5-second acquisition interval. All of the experiments based on AnV labeling were done in  $\text{Ca}^{2+}$ -containing buffer. **d, e** Measurements of ion selectivity of TMEM16A WT (**d**), L543K (**e**). Black traces denote currents in symmetric  $140 \text{ mM NaCl}$ . Red traces denote currents upon switching to an intracellular solution with low  $14 \text{ mM NaCl}$ . A voltage ramp ranging from  $-100 \text{ mV}$  to  $+100 \text{ mV}$  was used to elicit channel activation. Currents were recorded under  $100 \mu\text{M}$  intracellular  $\text{Ca}^{2+}$ . **f** The permeability ratios  $P_{\text{Cl}}/P_{\text{Na}}$  of TMEM16A WT and L543K. Two-tailed un-paired Student's t-test: p-value is 0.0191. Scale bars,  $20 \mu\text{m}$  in (**b**) and  $25 \mu\text{m}$  in (**c**). Source data are provided as a Source Data file.

**Supplementary Table 1.** sgRNA sequence for generating TMEM16F-knockout HEK293T

| Target  | Species | Cell-line | Target sequence      | Genomic location | Exon |
|---------|---------|-----------|----------------------|------------------|------|
| TMEM16F | Human   | HEK 293T  | AATAGTACTCACAAACTCCG | chr12:45302083   | 2    |

**Supplementary Table 2.** Primer sequences used for PCR amplification in Surveyor assay

| Target  | Test                                 |          | Sequence               |
|---------|--------------------------------------|----------|------------------------|
| TMEM16F | PCR amplification for Surveyor assay | Forward  | TTTTCAGTGGTAGACCTTGCCT |
|         |                                      | Reversed | AAGTTCAGCAACCTATTCCCAA |
